# Supplementary material
Source: PubMed Central journal article supplement (PMC5660608)
Supplement: NIHMS910829-supplement-suppl.pdf [file NIHMS910829-supplement-suppl.pdf]

***Supporting Information:***

**Patient-derived Airway Secretion Dissociation Technique to Isolate and Concentrate Immune cells using Closed-loop Inertial Microfluidics**

**Hyunryul Ryu<sup>1</sup>, Kyungyong Choi<sup>1,2</sup>, Yanyan Qu<sup>3</sup>, Taehong Kwon<sup>1,2</sup>, Janet S. Lee<sup>3,5</sup> and Jongyoon Han<sup>1,2,4</sup>**

<sup>1</sup>Research Laboratory of Electronics,

<sup>2</sup>Department of Electrical Engineering and Computer Science,

<sup>4</sup>Department of Biological Engineering, Massachusetts Institute of Technology, 77 Massachusetts Avenue, Cambridge, MA 02139, USA

<sup>3</sup>Department of Medicine, and the <sup>5</sup>Vascular Medicine Institute, University of Pittsburgh, NW628 Montefiore University Hospital, 3459 Fifth Avenue, Pittsburgh, PA 15213, USA

**Corresponding authors**

Jongyoon Han (jyhan@mit.edu)

**Supplementary Figure S1.** Photograph images of (A) 4-parallel spiral microfluidics (top) with fluidic adaptor (down), and (B) experimental setup for closed-loop operation.

**Supplementary Figure S2.** (A) Photograph and (B) microscopic images of patient-derived airway secretions before and after the closed-loop separation.

**Supplementary Figure S3.** Flow cytometric comparison of resulting suspension by (A) closed-loop separation and (B) mucolytic (DTT) method.

**Supplementary Figure S4.** Comparison of closed-loop and mucolytic (DTT) separated PMNs with blood-borne neutrophils (A) without external stimulation and (B) with neutrophil elastase inhibitor.

**Supplementary Figure S5.** Photograph images of patient airway secretion samples used in NE release functional assays.

A

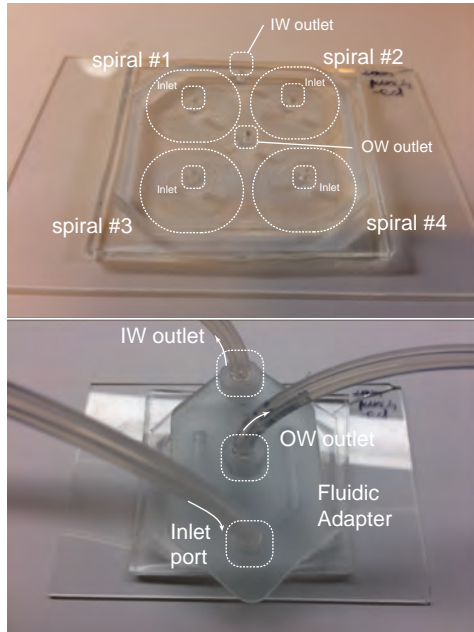

B

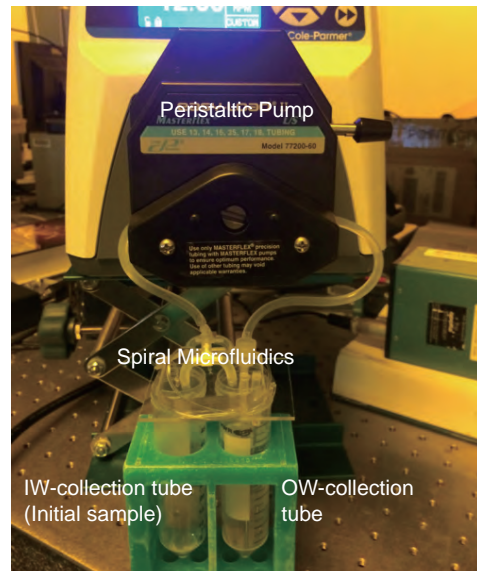

Supp. Figure S1

A

Patient-derived  
sputum

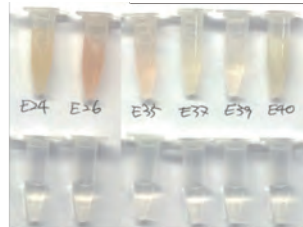

After closed-loop  
separation

B

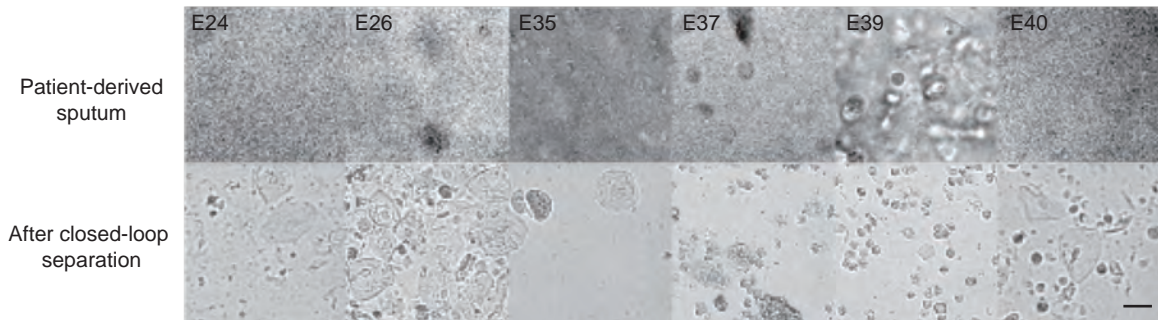

Supp. Figure S2

**A**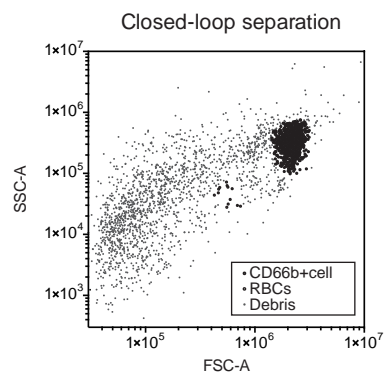**B**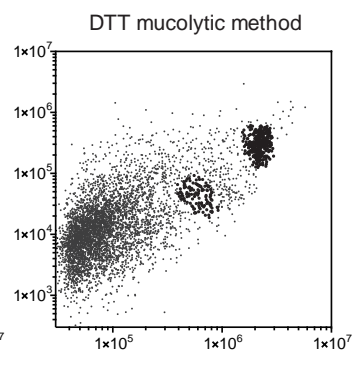**Supp. Figure S3**

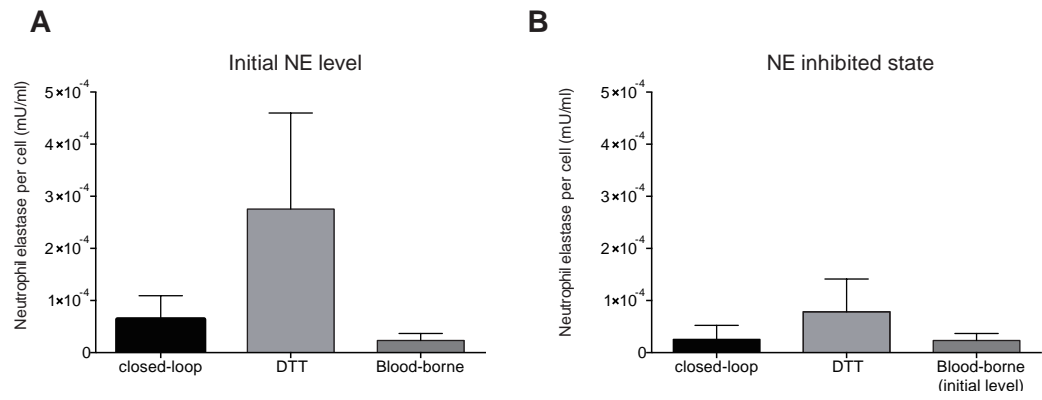

Supp. Figure S4

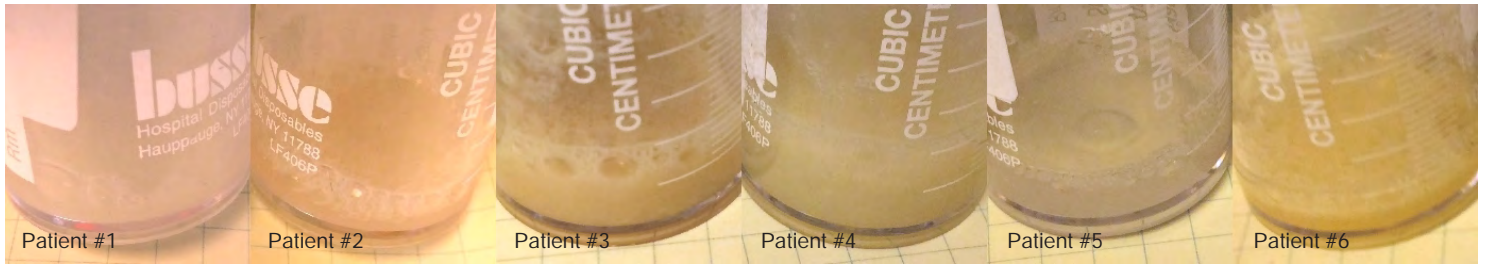

**Supp. Figure S5**
